# Supplementary material for: HIF drives lipid deposition and cancer in ccRCC via repression of fatty acid metabolism
Source: PubMed Central journal article supplement (PMC5701259; doi:10.1038/s41467-017-01965-8), 2017-11-24

Supplementary figure 1: Uncropped blots.

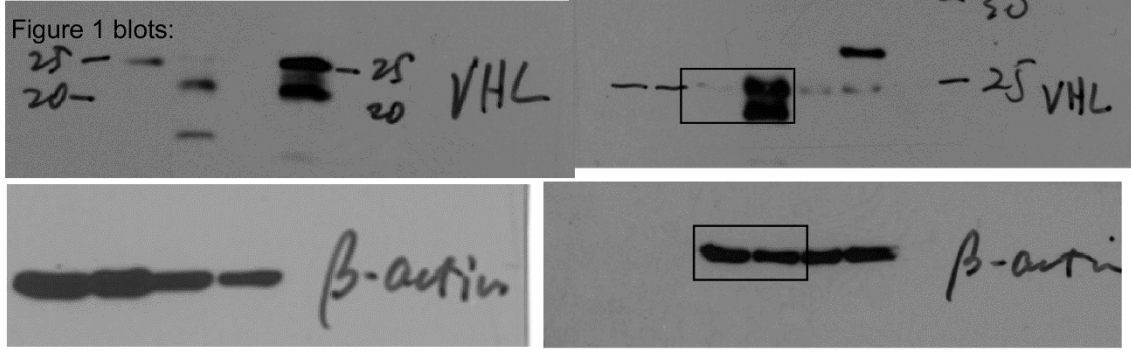

Figure 4 blots:

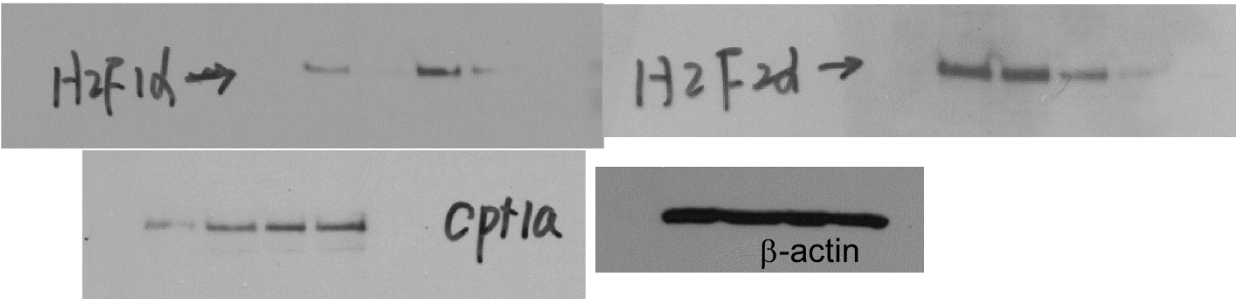

Figure 5 blots:

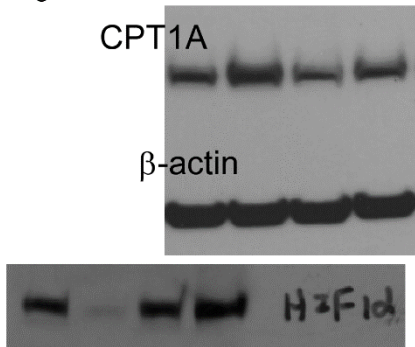

Figure 6 blots:

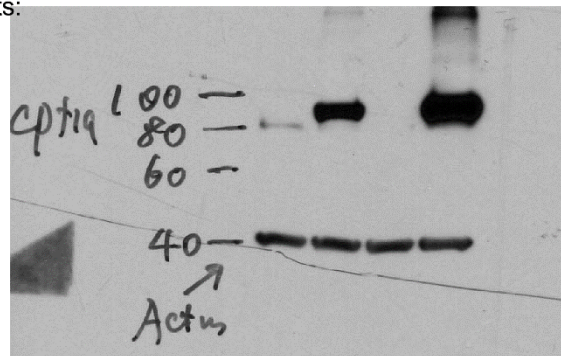

Figure 7 blots:

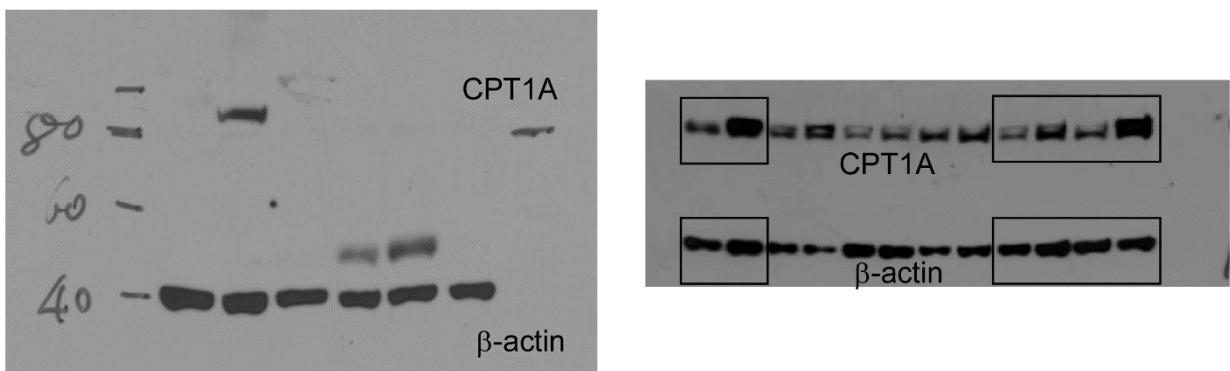

Supplement: 41467_2017_1965_MOESM1_ESM.pdf [file 41467_2017_1965_MOESM1_ESM.pdf]
